# Supplementary material for: Donor effect on supramolecular structures of silver(i) perchlorate complexes of macrocycles with O2S2X (XS, O and NH) donor sets
Source: Royal Society of Chemistry journal article supplement (doi:10.1039/b506438d), 2005-01-01
Supplement: b506438d.pdf [file b506438d.pdf]

## Electronic Supplementary Information

For

**Donor effect on supramolecular structures of silver(I) perchlorate complexes of macrocycles with O<sub>2</sub>S<sub>2</sub>X (X=S, O and NH) donor sets**

Il Yoon,<sup>a</sup> Joobeom Seo,<sup>a</sup> Ji-Eun Lee,<sup>a</sup> Mi Ryoung Song,<sup>a</sup> So Young Lee,<sup>a</sup> Kyu Seong Choi,<sup>b</sup> Ok-Sang Jung,<sup>c</sup> Ki-Min Park<sup>a</sup> and Shim Sung Lee\*<sup>a</sup>

<sup>a</sup> *Department of Chemistry and Research Institute of Natural Sciences, Gyeongsang National University, Chinju 660-701, S. Korea.*

<sup>b</sup> *Department of Chemistry, Kyungnam University, Masan 631-701, S. Korea.*

<sup>c</sup> *Department of Chemistry, Pusan National University, Pusan 609-735, S. Korea.*

\* Corresponding author. E-mail: [sslee@gsnu.ac.kr](mailto:sslee@gsnu.ac.kr)

Synthesis of  $[\text{Ag}(\text{L}^1)_2](\text{ClO}_4)$  (**1**): To a stirred solution of  $\text{L}^1$  (42.3 mg, 0.161 mmol) in dichloromethane (2 mL), a solution of silver perchlorate (22.3 mg, 0.161 mmol) in methanol (1 mL) was added. White precipitate was formed immediately. The solid was filtered off, and dissolved in acetonitrile (1 mL). X-ray quality crystals of **1** were obtained by diffusion of diethyl ether into the solution. MS(FAB):  $m/z = 891$  ( $[\text{Ag}(\text{L}^1)_2]^+$ ,  $[\text{C}_{40}\text{H}_{48}\text{AgO}_4\text{S}_6]^+$ ),  $m/z = 499$  ( $[\text{Ag}(\text{L}^1)]^+$ ,  $[\text{C}_{20}\text{H}_{24}\text{AgO}_2\text{S}_3]^+$ ). IR (KBr,  $\text{cm}^{-1}$ ) 2962w, 1589m, 1496m, 1450m, 1242m, 1095vs ( $\text{ClO}_4^-$ ), 941m, 779m, 617m.

Synthesis of  $\{[\text{AgL}^2(\text{CH}_3\text{CN})](\text{ClO}_4)\}_2$  (**2a**): Silver perchlorate (33.4 mg, 0.161 mmol) and  $\text{L}^2$  (60.5 mg, 0.161 mmol) were stirred together in acetonitrile (3 mL). X-ray quality crystals of **2a** were obtained by slow evaporation of reaction mixture. MS(FAB):  $m/z = 483$  ( $[\text{Ag}(\text{L}^2)]^+$ ,  $[\text{C}_{20}\text{H}_{24}\text{AgO}_3\text{S}_2]^+$ ). IR (KBr,  $\text{cm}^{-1}$ ) 2939w, 1605m, 1497m, 1450m, 1095vs ( $\text{ClO}_4^-$ ), 941m, 771m, 625m.

Synthesis of  $\{[\text{Ag}_4(\text{L}^2)_2(\text{CH}_3\text{OH})_2](\text{ClO}_4)_4\}_n$  (**2b**): Silver perchlorate (30.4 mg, 0.147 mmol) and  $\text{L}^2$  (55.3 mg, 0.147 mmol) were stirred together in methanol (5 mL). X-ray quality crystals of **2a** were obtained by slow evaporation of reaction mixture. MS(FAB):  $m/z = 499$  ( $[\text{Ag}_2(\text{L}^2)_2(\text{CH}_3\text{OH})]^2+$ ,  $[\text{C}_{41}\text{H}_{52}\text{Ag}_2\text{O}_7\text{S}_4]^2+$ ), 379 ( $[\text{Ag}_3(\text{L}^2)_2(\text{CH}_3\text{OH})_2]^3+$ ,  $[\text{C}_{42}\text{H}_{56}\text{Ag}_3\text{O}_8\text{S}_4]^3+$ ). IR (KBr,  $\text{cm}^{-1}$ ) 3487m, 2939w, 1597m, 1496m, 1450m, 1242m, 1103vs ( $\text{ClO}_4^-$ ), 933m, 774m, 617m.

Synthesis of  $[\text{Ag}_4(\text{L}^3)_4(\mu\text{-ClO}_4)_2](\text{ClO}_4)_2(\text{CH}_3\text{CN})_2$  (**3**): To a stirred solution of  $\text{L}^3$  (100.3 mg, 0.266 mmol) in dichloromethane (5 mL), a solution of silver perchlorate (55.2 mg, 0.266 mmol) in methanol (2 mL) was added. White precipitate was formed immediately. The solid was filtered off, and dissolved in acetonitrile (2 mL). X-ray quality crystals of **1** were obtained by diffusion of diethyl ether into the solution. HRMS: Calcd. for  $\text{C}_{40}\text{H}_{50}\text{O}_8\text{N}_2\text{ClS}_4\text{Ag}_2$ : 1063.0240; Found: 1063.0249. IR (KBr,  $\text{cm}^{-1}$ ) 3448s, 2931w, 1596w, 1488m, 1450m, 1250s, 1219s, 1103s, 933s, 763s, 501s.

**Table S1** Crystal and experimental data for **1**, **2a**, **2b** and **3**

|                                            | <b>1</b>                                                          | <b>2a</b>                                                          | <b>2b</b>                                                                                      | <b>3</b>                                                                                                       |
|--------------------------------------------|-------------------------------------------------------------------|--------------------------------------------------------------------|------------------------------------------------------------------------------------------------|----------------------------------------------------------------------------------------------------------------|
| Formula                                    | C <sub>40</sub> H <sub>48</sub> AgClO <sub>8</sub> S <sub>6</sub> | C <sub>22</sub> H <sub>27</sub> AgClNO <sub>7</sub> S <sub>2</sub> | C <sub>42</sub> H <sub>56</sub> Ag <sub>4</sub> Cl <sub>4</sub> O <sub>24</sub> S <sub>4</sub> | C <sub>84</sub> H <sub>106</sub> Ag <sub>4</sub> Cl <sub>4</sub> N <sub>6</sub> O <sub>24</sub> S <sub>8</sub> |
| Formula weight                             | 992.46                                                            | 624.89                                                             | 1646.39                                                                                        | 2413.51                                                                                                        |
| Temperature                                | 298(2) K                                                          | 298(2) K                                                           | 296(2) K                                                                                       | 173(2) K                                                                                                       |
| Crystal system                             | Triclinic                                                         | Monoclinic                                                         | Monoclinic                                                                                     | Triclinic                                                                                                      |
| Space group                                | <i>P</i> -1                                                       | <i>P</i> 2 <sub>1</sub> / <i>c</i>                                 | <i>P</i> 2 <sub>1</sub> / <i>c</i>                                                             | <i>P</i> -1                                                                                                    |
| <i>Z</i>                                   | 1                                                                 | 4                                                                  | 4                                                                                              | 1                                                                                                              |
| <i>a</i> (Å)                               | 8.9985(7)                                                         | 10.6319(10)                                                        | 24.310(2)                                                                                      | 11.5691(8)                                                                                                     |
| <i>b</i> (Å)                               | 11.6633(9)                                                        | 21.039(2)                                                          | 12.6134(12)                                                                                    | 13.3821(10)                                                                                                    |
| <i>c</i> (Å)                               | 12.3578(9)                                                        | 11.8585(11)                                                        | 18.2148(18)                                                                                    | 16.2842(12)                                                                                                    |
| $\alpha$ (°)                               | 116.7000(10)                                                      |                                                                    |                                                                                                | 85.7870(10)                                                                                                    |
| $\beta$ (°)                                | 95.460(2)                                                         | 107.158(2)                                                         | 92.659(2)                                                                                      | 75.2830(10)                                                                                                    |
| $\gamma$ (°)                               | 106.721(2)                                                        |                                                                    |                                                                                                | 82.8980(10)                                                                                                    |
| <i>V</i> (Å <sup>3</sup> )                 | 1070.83(14)                                                       | 2534.5(4)                                                          | 5579.2(9)                                                                                      | 2417.4(3)                                                                                                      |
| <i>D</i> <sub>x</sub> (g/cm <sup>3</sup> ) | 1.539                                                             | 1.638                                                              | 1.960                                                                                          | 1.658                                                                                                          |
| 2 $\theta$ <sub>max</sub> (°)              | 56.62                                                             | 56.72                                                              | 57.16                                                                                          | 56.64                                                                                                          |
| <i>R</i>                                   | 0.0426                                                            | 0.0419                                                             | 0.0672                                                                                         | 0.0444                                                                                                         |
| <i>wR</i>                                  | 0.1005                                                            | 0.1053                                                             | 0.1725                                                                                         | 0.1111                                                                                                         |
| No. of reflection used [ $>2\sigma(I)$ ]   | 4933                                                              | 6159                                                               | 13691                                                                                          | 11330                                                                                                          |
| Diffractometer                             | Bruker SMART CCD system                                           | Bruker SMART CCD system                                            | Bruker SMART CCD system                                                                        | Bruker SMART CCD system                                                                                        |
| Structure determination                    | SHELXTL                                                           | SHELXTL                                                            | SHELXTL                                                                                        | SHELXTL                                                                                                        |
| Refinement                                 | full-matrix                                                       | full-matrix                                                        | full-matrix                                                                                    | full-matrix                                                                                                    |

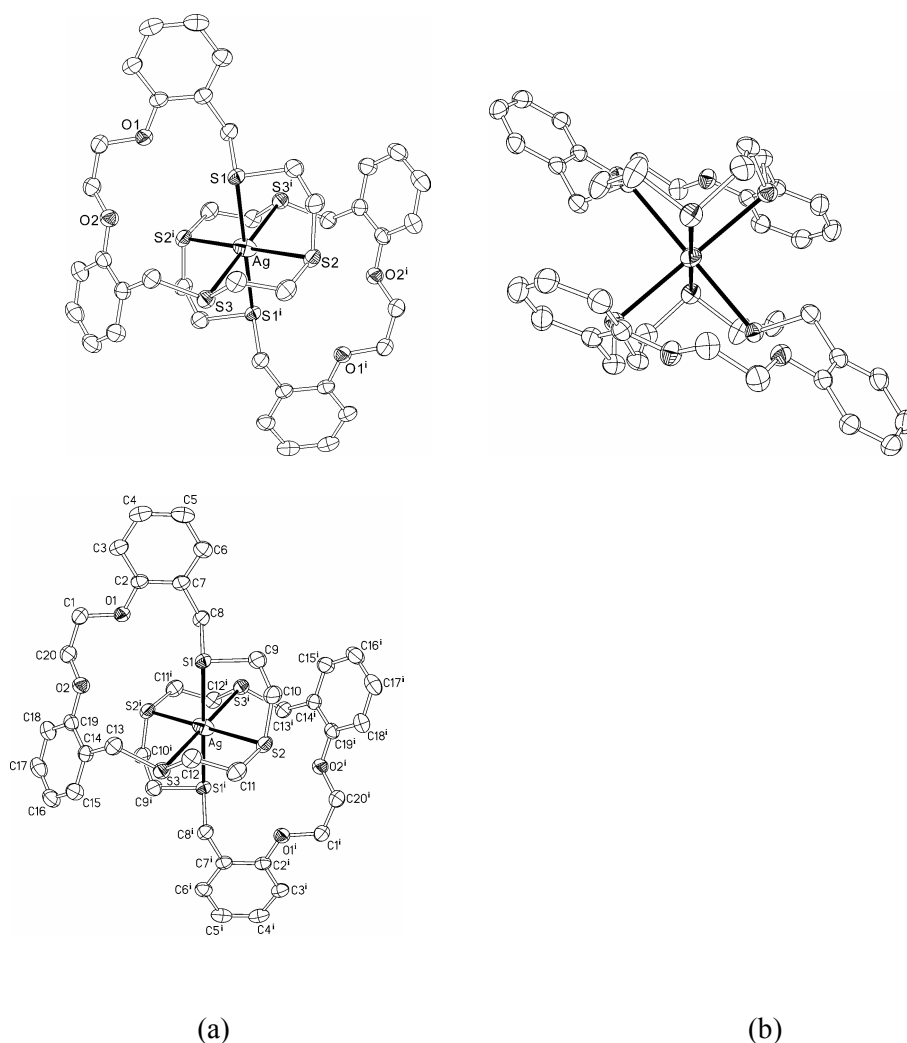

**Fig. S1** Sandwich structure of **1**,  $[\text{Ag}(\text{L}^1)_2](\text{ClO}_4)$  (a) top view and (b) side view. Hydrogen atoms and noncoordinating anions are omitted. Ellipsoids are drawn at the 30 % probability level. Selected bond lengths ( $\text{\AA}$ ) and angles (deg): Ag-S(1) 2.730(1), Ag-S(2) 2.860(1), Ag-S(3) 2.792(1). S(1)-Ag-S(2) 76.00(2), S(1)-Ag-S(3) 89.85(2), S(2)-Ag-S(3) 76.35(2), S(1)-Ag-S(2') 104.00(2), S(1)-Ag-S(3') 90.15(2). O(1)-C-C-O(2) 65.71(33), S(1)-C-C-S(2) 61.22(39), S(2)-C-C-S(3) 67.10(31) [symmetry operation:  $-x + 1, -y + 1, -z + 1$ ].

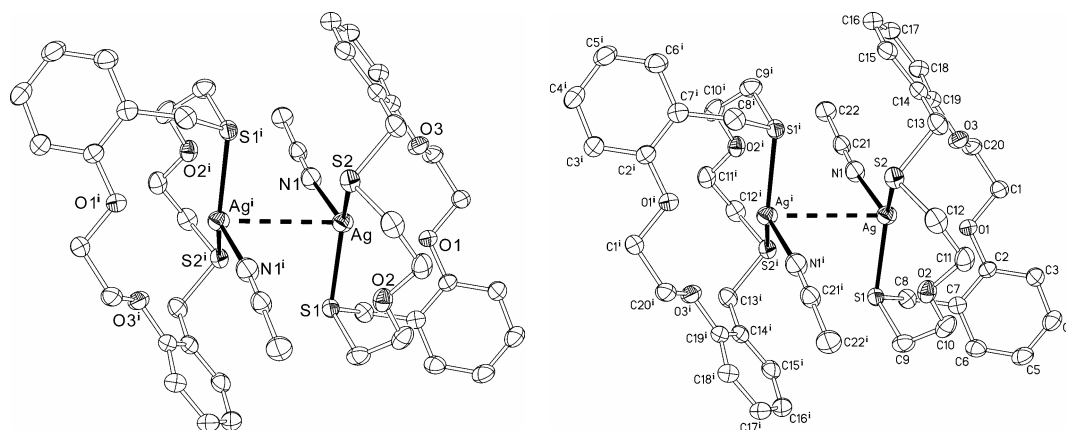

**Fig. S2** Dimeric structure of **2a**,  $\{[\text{AgL}^2(\text{CH}_3\text{CN})](\text{ClO}_4)\}_2$ . Hydrogen atoms and noncoordinating anions are omitted. Ellipsoids are drawn at the 30 % probability level. Selected bond lengths (Å) and angles (deg): Ag-S(1) 2.512(1), Ag-S(2) 2.485(1), Ag-N(1) 2.321(3), Ag-O(2) 2.946(2), Ag-Ag<sup>i</sup> 3.329(1). S(1)-Ag-S(2) 134.28(3), S(1)-Ag-N(1) 101.76(9), S(2)-Ag-N(1) 119.05(9), S(1)-Ag-Ag<sup>i</sup> 85.83(2), S(2)-Ag-Ag<sup>i</sup> 86.64(2), N(1)-Ag-Ag<sup>i</sup> 73.73(8). O(1)-C-C-O(3) 76.92(37), S(1)-C-C-O(2) 62.21(34), S(2)-C-C-O(2) -66.27(34) [symmetry operation:  $-x, -y + 2, -z + 1$ ].

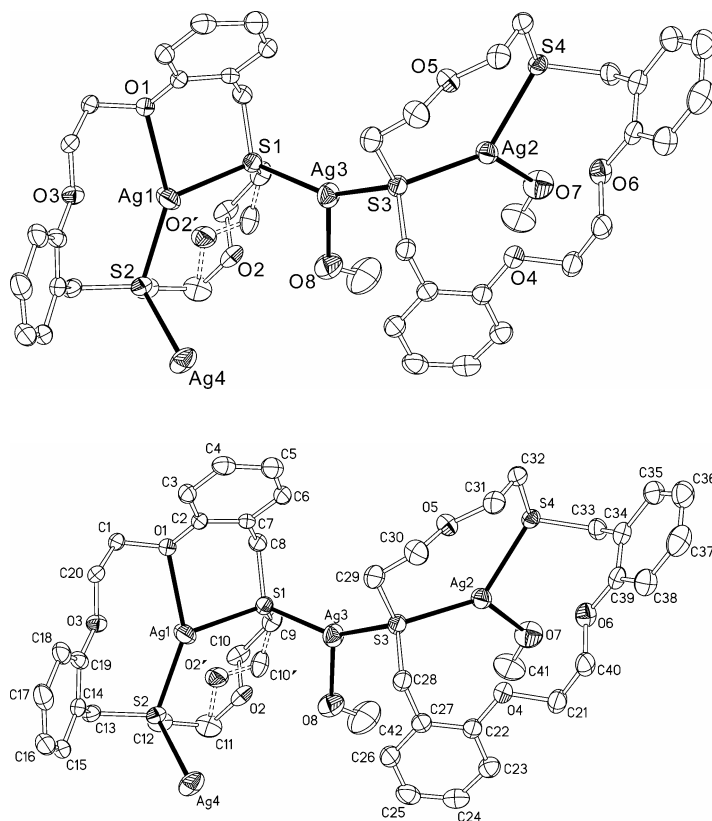

**Fig. S3** 1-D polymeric structure of **2b**,  $\{[Ag_4(L^2)(CH_3OH)_2](ClO_4)_4\}_n$ . Hydrogen atoms and noncoordinating anions are omitted. Ellipsoids are drawn at the 30 % probability level. O2 and C10 atoms are disordered occupying two positions (65.6:34.4). Selected bond lengths (Å) and angles (deg): Ag(1)-S(1) 2.470(2), Ag(1)-S(2) 2.465(2), Ag(1)-O(1) 2.516(5), Ag(2)-S(3) 2.508(2), Ag(2)-S(4) 2.561(2), Ag(2)-O(7) 2.398(7), Ag(3)-S(1) 2.497(2), Ag(3)-S(3) 2.476(2), Ag(3)-O(8) 2.358(8), Ag(4)-S(2) 2.433(2), Ag(4)-S(4') 2.476(2). S(1)-Ag(1)-S(2) 126.28(7), S(1)-Ag(1)-O(1) 84.05(12), S(2)-Ag(1)-O(1) 149.29(13), S(3)-Ag(2)-S(4) 136.40(7), S(3)-Ag(2)-O(7) 128.70(20), S(4)-Ag(2)-O(7) 91.90(20), S(1)-Ag(3)-S(3) 149.59(7), S(1)-Ag(3)-O(8) 90.57(20), S(3)-Ag(3)-O(8) 119.81(20), S(2)-Ag(4)-S(4') 148.56(7). O(1)-C-C-O(3) -72.98(75), S(1)-C-C-O(2) -58.58(2.15), S(1)-C-C'-O(2') 53.81(5.46), O(2)-C-C-S(2) -46.23(1.29), O(2')-C-C-S(2) -74.95(1.69), O(4)-C-C-O(6) -79.05(85), S(3)-C-C-O(5) 67.93(86), O(5)-C-C-S(4) -61.47(75) [symmetry operation:  $x, -y, z$ ].

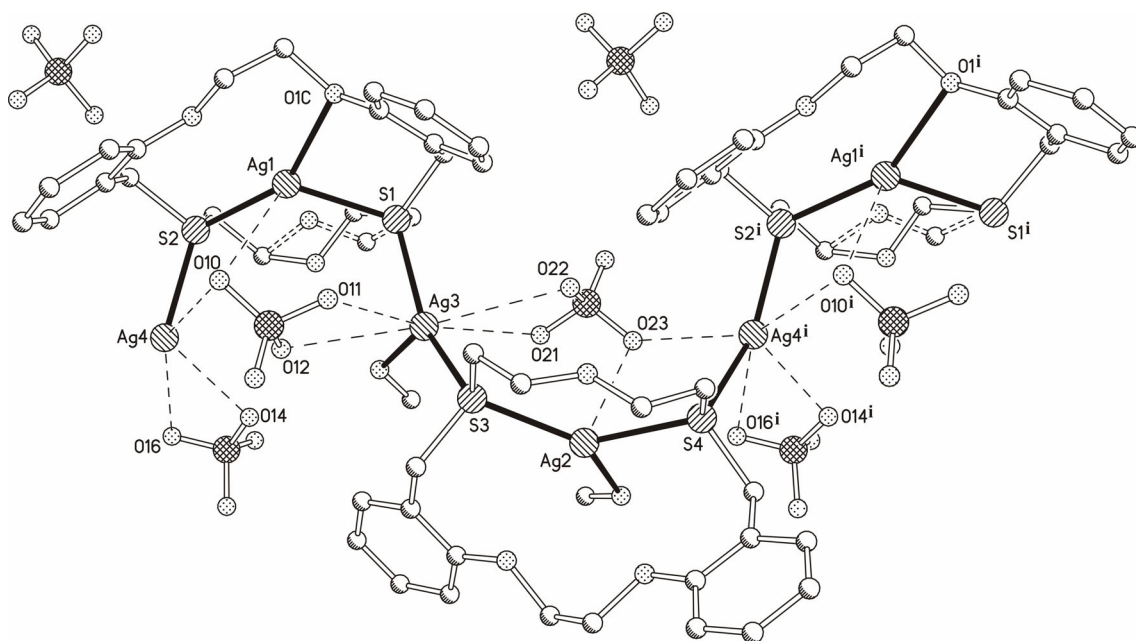

**Fig. S4** 1-D polymeric structure of **2b**,  $\{[Ag_4(L^2)(CH_3OH)_2](ClO_4)_4\}_n$  showing anion interactions (dashed lines). Hydrogen atoms anions are omitted. Selected interatomic distances (Å): Ag(1)···O(10) 3.260(12), Ag(2)···O(23) 3.193(22), Ag(3)···O(11) 2.922(11), Ag(3)···O(12) 3.049(11), Ag(3)···O(22) 3.200(11), Ag(3)···O(21) 2.922(10), Ag(4)···O(10) 3.450(11), Ag(4)···O(16) 3.175(26), Ag(4)···O(14) 2.691(11), Ag(4<sup>i</sup>)···O(23) 2.911(14) [symmetry operation:  $x, y-1, z$ ].

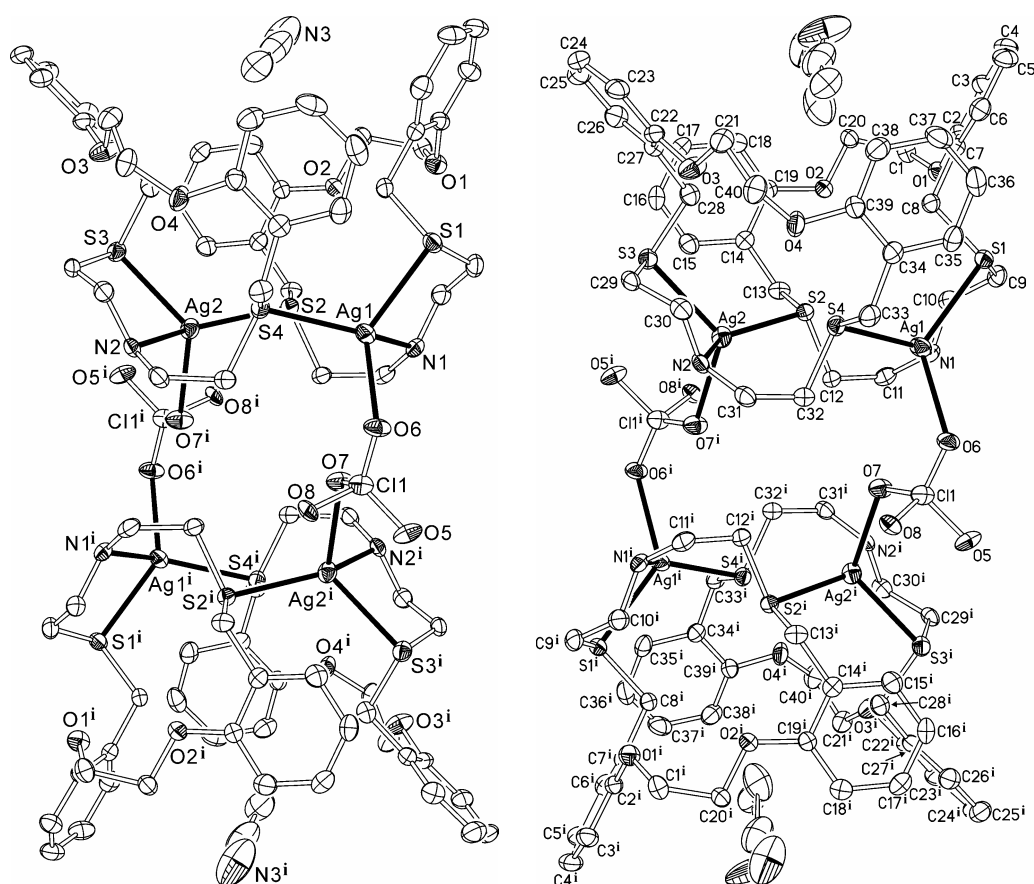

**Fig. S5** Tetrameric bowl-type structure of **3**,  $[\text{Ag}_4(\text{L}^3)_4(\mu\text{-ClO}_4)_2](\text{ClO}_4)_2(\text{CH}_3\text{CN})_2$ . Hydrogen atoms and noncoordinating anions are omitted. The acetonitrile solvent is disordered (85.5:14.5) with C44-C43-N3 and C44'-C43-N3' units occupying two positions. Selected bond lengths (Å) and angles (deg): Ag(1)-S(1) 2.578(1), Ag(1)-S(4) 2.530(1), Ag(1)-N(1) 2.379(4), Ag(1)-O(6) 2.415(3), Ag(2)-S(3) 2.575(1), Ag(2)-S(2) 2.499(1), Ag(2)-N(2) 2.369(4), Ag(2)-O(7<sup>i</sup>) 2.421(3). S(1)-Ag(1)-N(1) 82.53(9). S(1)-Ag(1)-S(4) 111.14(4), N(1)-Ag(1)-S(4) 134.57(9), S(1)-Ag(1)-O(6) 128.08(8), N(1)-Ag(1)-O(6) 102.72(12), S(4)-Ag(1)-O(6) 101.19(8), S(3)-Ag(2)-N(2) 82.32(9), S(3)-Ag(2)-S(2) 118.25(4), N(2)-Ag(2)-S(2) 137.06(9), S(3)-Ag(2)-O(7<sup>i</sup>) 121.61(8), N(2)-Ag(2)-O(7<sup>i</sup>) 95.53(12), S(2)-Ag(2)-O(7<sup>i</sup>) 102.47(9). O(1)-C-C-O(2) -67.28(45), S(1)-C-C-N(1) -63.09(45), N(1)-C-C-S(2) 61.79(47), O(3)-C-C-O(4) 54.90(53), S(3)-C-C-N(2) -62.72(42), N(2)-C-C-S(4) 62.31(45) [symmetry operation:  $-x + 1, -y + 2, -z + 1$ ].



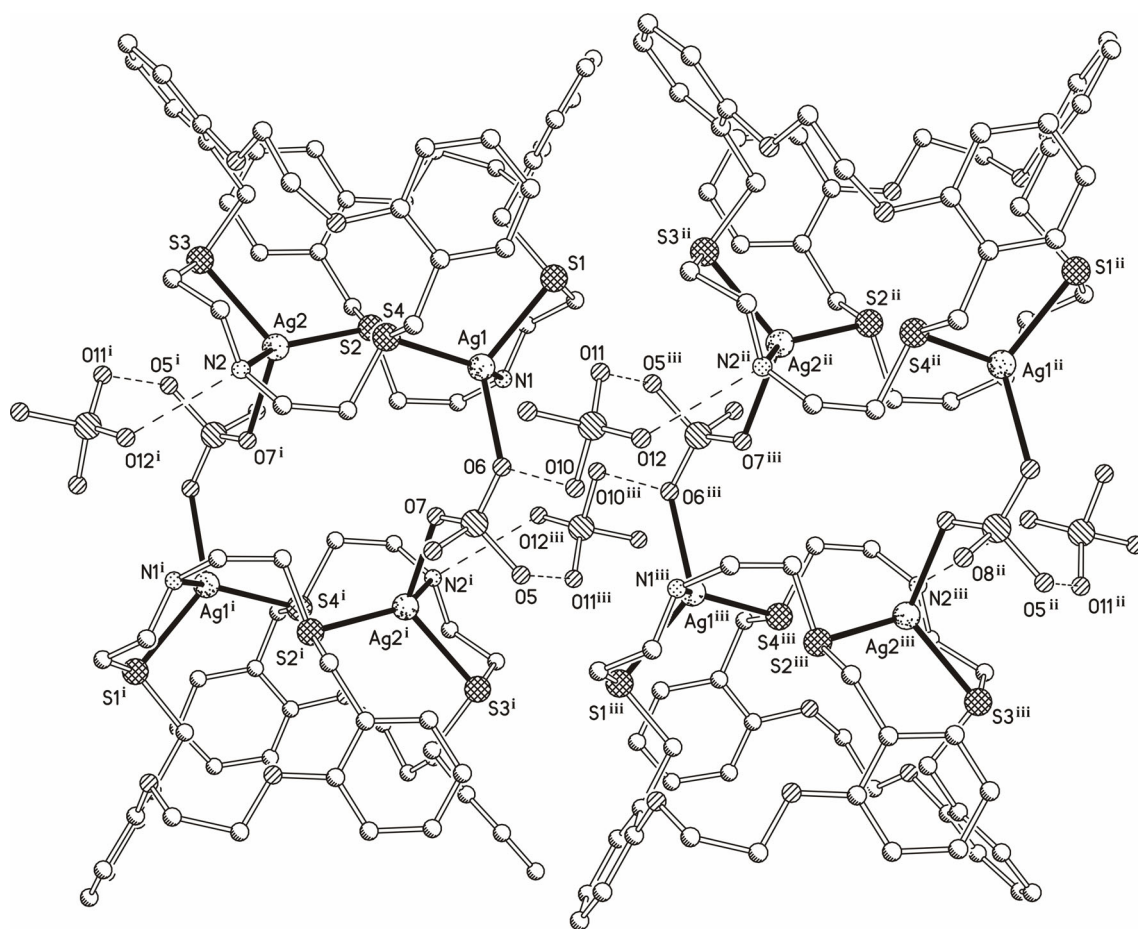

**Fig. S6** Tetrameric bowl-type structure of **3**,  $[\text{Ag}_4(\text{L}^3)_4(\mu\text{-ClO}_4)_2](\text{ClO}_4)_2(\text{CH}_3\text{CN})_2$  showing anion interactions (dashed lines). Hydrogen atoms are omitted. Selected interatomic distances (Å): O(6)⋯O(10) 2.560(4), O(11)⋯O(5<sup>iii</sup>) 2.529(5), O(12)⋯N(2<sup>ii</sup>) 2.920(4) [symmetry operations: i)  $-x+1, -y+2, -z+1$ ; ii)  $x+1, y, z$ ; iii)  $-x+2, -y+2, -z+1$ ].

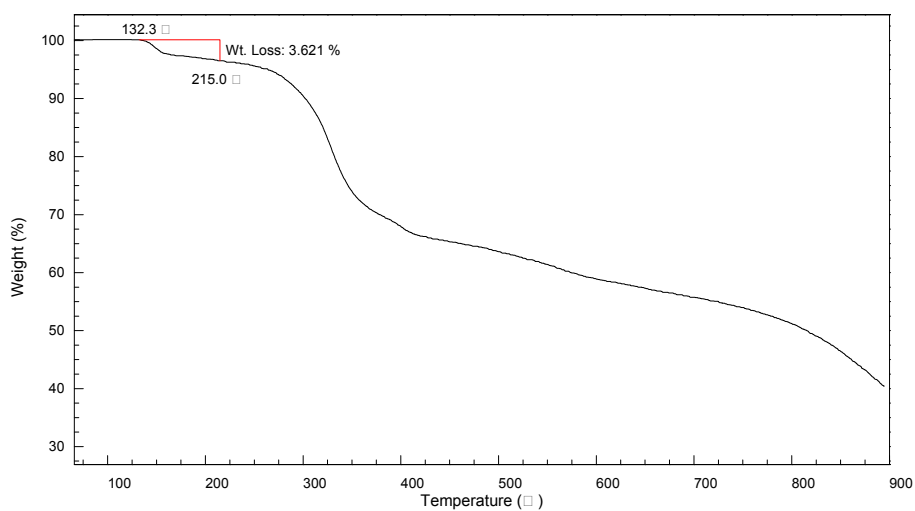

**Fig. S7** TGA diagram of  $[\text{Ag}_4(\text{L}^3)_4(\mu\text{-ClO}_4)_2](\text{ClO}_4)_2(\text{CH}_3\text{CN})_2$  (**3**), recorded 10 °C/min.

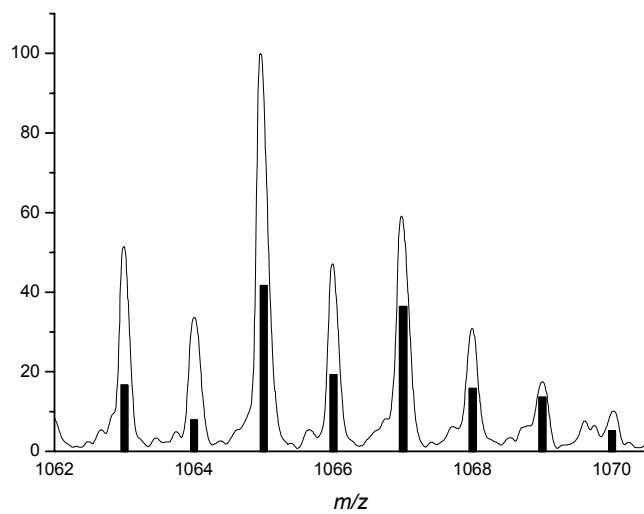

**Fig. S8** Isotope pattern (FAB mass) of **3**. Bar-graph indicates the half-height of calculated values.
